# Supplementary material for: Evaluation of Physicochemical Properties of Beetroot-Based Dietary Supplements
Source: MDPI journal article supplement (doi:10.3390/foods10081693), 2021-07-22
Supplement: s1 [file s1]

**Table S1.** The producers' information contained on the supplement label

| Form     | Code | Number of dosage units | Product net weight (g) | The content of beetroot extract or preserves/dosage unit                                                                                                                                                                                       | Declared weight of the dosage unit (g) | Recommendation (dosage units/day) | Origin country      |
|----------|------|------------------------|------------------------|------------------------------------------------------------------------------------------------------------------------------------------------------------------------------------------------------------------------------------------------|----------------------------------------|-----------------------------------|---------------------|
| CAPSULES | A1   | 90                     | 45                     | 400 mg of root extract; 40 mg of nitrates                                                                                                                                                                                                      | 0.5                                    | 1x1 caps.                         | Poland (PL)         |
|          | A2   |                        |                        |                                                                                                                                                                                                                                                |                                        |                                   | Poland (PL)         |
|          | B1   | 90                     | 45                     | 400 mg root extract (15:1); gelatine                                                                                                                                                                                                           | 0.5                                    | 1x1 caps.                         | Poland (PL)         |
|          | B2   |                        |                        |                                                                                                                                                                                                                                                |                                        |                                   | Poland (PL)         |
|          | C1   | 60                     | 35.76                  | dried juice concentrate; 38 mg of vitamin C; 2.8 mg of iron; capsule shell (gelatin of animal origin)                                                                                                                                          | 0.596                                  | 2x1 caps. during meal             | Poland (PL)         |
|          | C2   |                        |                        |                                                                                                                                                                                                                                                |                                        |                                   | Poland (PL)         |
|          | D1   | 30                     | 11.3                   | 268 mg of beetroot concentrate; vitamin C 20 mg ; iron gluconate 12 mg (1.4 mg iron); starch; anti-caking agent: magnesium salts of fatty acids; silicon dioxide                                                                               | 0.376                                  | 1x3 caps.                         | Poland (PL)         |
|          | D2   |                        |                        |                                                                                                                                                                                                                                                |                                        |                                   | Poland (PL)         |
|          | E1   | 60                     | 41.4                   | 550 mg of <i>Beta vulgaris</i> extract 4:1; pullulan capsule                                                                                                                                                                                   | 0.69                                   | 1x2 caps.                         | Poland (PL)         |
|          | E2   |                        |                        |                                                                                                                                                                                                                                                |                                        |                                   | Poland (PL)         |
|          | F1   | 100                    | NA*                    | 500 mg of beetroot; magnesium stearate; gelatin capsule                                                                                                                                                                                        | NA*                                    | 2-3x2 caps.                       | USA                 |
|          | G1   | 60                     | NA*                    | 700 mg of organic prepared beetroot (beetroot extract, maltodextrin) corresponding to 4620 mg of dried beetroot); vegetable capsule shell (hydroxypropylmethylcellulose)                                                                       | NA*                                    | 1x2 caps. during meal             | United Kingdom (UK) |
|          | H1   | 100                    | NA*                    | 500 mg of beetroot; vegetable capsules (modified cellulose); cellulose; silica; magnesium stearate                                                                                                                                             | NA*                                    | 3x2 caps. during meal             | USA                 |
|          | I1   | 90                     | NA*                    | 500 mg of beetroot extract ( <i>Beta vulgaris</i> ) (standardized for 0.3% betanin); cellulose; silicon dioxide; vegetable fatty; vegetable mineral salts                                                                                      | NA*                                    | 3x1 caps. during meal             | USA                 |
| CAPSULES | J1   | 60                     | NA*                    | 450 mg of beetroot extract; bulking agent: microcrystalline cellulose; shells: hydroxypropyl methylcellulose                                                                                                                                   | NA*                                    | 1x1-2 caps.                       | USA                 |
|          | K1   | 90                     | NA*                    | 500 mg of beetroot extract ( <i>Beta vulgaris</i> ) (5:1); bulking agents: maltodextrin, microcrystalline cellulose; vegetable capsule shell: hydroxypropyl methylcellulose; anti-caking agents: silicon dioxide, vegetable magnesium stearate | NA*                                    | 1x1 caps.                         | USA                 |
|          | L1   | 60                     | NA*                    | 300 mg of freeze-dried juice from organic pickled beetroot; micronized apple fiber; cellulose capsule shell                                                                                                                                    | 0.3                                    | 2x1 caps. before meal             | Poland (PL)         |

|         |    |     |      |                                                                                                                                                                                                                                           |       |                               |                     |
|---------|----|-----|------|-------------------------------------------------------------------------------------------------------------------------------------------------------------------------------------------------------------------------------------------|-------|-------------------------------|---------------------|
| TABLETS | M1 | 60  | 33   | 500 mg of dried juice concentrate (refers to 2.75 g fresh beetroot); 1 mg of B <sub>6</sub> ; 1.25µg of B <sub>12</sub> ; bulking agent: microcrystalline cellulose; anti-caking agents: fatty magnesium salts, silicon dioxide           | 0.55  | 1-2x3 caps.                   | Poland (PL)         |
|         | M2 |     |      |                                                                                                                                                                                                                                           |       |                               | Poland (PL)         |
|         | N1 | 60  | 39   | 488 mg of beetroot concentrate; vitamin C 20 mg; iron gluconate 12 mg (1.4 mg iron); starch; anti-caking agent: magnesium salts of fatty acids; silicon dioxide                                                                           | 0.65  | 1x3                           | Poland (PL)         |
|         | N2 |     |      |                                                                                                                                                                                                                                           |       |                               | Poland (PL)         |
|         | O1 | 120 | 111  | 500 mg of dried juice (refers to 3.5 g of fresh beetroot); anti-caking agent: magnesium salts of fatty acids; silicon dioxide                                                                                                             | 0.925 | 1-2x3 caps.                   | Poland (PL)         |
|         | O2 |     |      |                                                                                                                                                                                                                                           |       | during a meal or after a meal | Poland (PL)         |
|         | P1 | 100 | 35   | 132.375 mg of dicalcium phosphate; 132.375 mg of microcrystalline cellulose; 80 mg of beetroot extract (including 1% betaine); 2.25 mg vegetable magnesium stearate                                                                       | 0.35  | 1x2 tabl.                     | United Kingdom (UK) |
|         | Q1 | 60  | 37.8 | 500 mg of fresh beetroot; maltodextrin; 40 mg of L-ascorbic acid (vitamin C); 7 mg iron II fumarate (iron); bulking agent: sorbitols; anti-caking agents: magnesium salts of fatty acids, silicon dioxide                                 | 0.63  | 1-2x1 tabl.                   | Poland (PL)         |
|         | R1 | 60  | 39   | beetroot concentrate 500 mg; vitamin C 20 mg; 12 mg iron (II) gluconate (1.4 mg iron); starch; anti-caking agent: magnesium salts of fatty acids, silicon dioxide                                                                         | 0.65  | 3x1tabl.                      | Poland (PL)         |
|         | S1 | 60  | NA*  | 500 mg of dried red beetroot concentrate; 1 mg vitamin B <sub>6</sub> ; 1.25 mg vitamin B <sub>12</sub> ; anti-caking agents: magnesium salts of fatty acids, silicon dioxide                                                             | NA*   | 3x1-2 tabl.                   | Poland (PL)         |
| TABLETS | T1 | 120 | 42   | 350 mg of beetroot extract 20:1 (80 mg of betanins); binder: dicalcium phosphate; emulsifier: microcrystalline cellulose; stabilizer: magnesium salts of fatty acids                                                                      | 0.35  | 1x1-2 tabl. during meal       | United Kingdom (UK) |
|         | U1 | 100 | 146  | 1000 mg of beetroot extract; bulking agent: microcrystalline cellulose; anti-caking agent: stearic acid, magnesium stearate; stabilizer and solubiliser: sodium croscarmellose                                                            | 1.46  | 1-3x1 tabl.                   | USA                 |
|         | W1 | 120 | 42   | 160 mg of 10:1 beetroot extract (provides 1% nitrate); bulking agents: calcium hydrogen phosphate and cellulose; anti-caking agent: magnesium salts of fatty acids and silicon dioxide                                                    | 0.35  | 1x1 tabl.                     | United Kingdom (UK) |
|         | Y1 | 90  | NA*  | 300 mg of beetroot extract; bulking agents: dicalcium phosphate, microcrystalline cellulose; anti-caking agents: stearic acid, silicon dioxide, magnesium stearate; glazing agents: hydroxypropyl methylcellulose, glycerin, carnauba wax | NA*   | 3x1 tabl.                     | United Kingdom (UK) |

\*NA - no data on the label provided from the manufacturer



|  |    |        |       |           |     |        |   |       |        |       |       |      |      |       |
|--|----|--------|-------|-----------|-----|--------|---|-------|--------|-------|-------|------|------|-------|
|  | N1 | 1.77   | 1.189 | iron(II)  | 1.4 | 84.91  | 3 | 19.81 | 35.67  | 0.008 | 0.005 | 0.19 | 0.14 | 1:238 |
|  | N1 | 2.99   | 1.970 | gluconate | 1.4 | 140.69 | 3 | 32.83 | 59.10  | 0.007 | 0.004 | 0.16 | 0.12 | 2:985 |
|  | O1 | 0.039  | 0.040 | *NA       | *NA | *ND    | 6 | 1.33  | 2.40   | 0.003 | 0.004 | 0.29 | 0.21 | 1:10  |
|  | O2 | 0.039  | 0.040 | *NA       | *NA | *ND    | 6 | 1.34  | 2.40   | 0.002 | 0.003 | 0.20 | 0.15 | 3:40  |
|  | P1 | 0.006  | 0.007 | *NA       | *NA | *ND    | 2 | 0.08  | 0.14   | 0.014 | 0.005 | 0.13 | 0.09 | 5:7   |
|  | Q1 | 3.83   | 8.960 | iron(II)  | 7.0 | 128.01 | 2 | 99.56 | 179.20 | 0.004 | 0.003 | 0.06 | 0.05 | *ND   |
|  | R1 | 0.639  | 1.378 | fumarate  |     |        |   |       |        |       |       |      |      |       |
|  |    |        |       | iron(II)  | 1.4 | 98.46  | 3 | 22.97 | 41.34  | 0.007 | 0.005 | 0.18 | 0.13 | 2:551 |
|  | S1 | 0.001  | 0.005 | gluconate |     |        |   |       |        |       |       |      |      |       |
|  |    |        |       | *NA       | *NA | *ND    | 6 | 0.16  | 0.30   | 0.001 | 0.001 | 0.11 | 0.08 | 1:5   |
|  | T1 | 0.0013 | 0.015 | *NA       | *NA | *ND    | 2 | 0.17  | 0.30   | 0.002 | 0.001 | 0.02 | 0.02 | 1:15  |
|  | U1 | <LOQ   | <LOQ  | *NA       | *NA | *ND    | 3 | 0.00  | 0.00   | <LOQ  | <LOQ  | 0.00 | 0.00 | *ND   |
|  | W1 | 0.004  | 0.005 | *NA       | *NA | *ND    | 1 | 0.03  | 0.05   | 0.002 | 0.001 | 0.01 | 0.01 | 1:5   |
|  | Y1 | 0.003  | 0.005 | *NA       | *NA | *ND    | 6 | 0.17  | 0.30   | 0.003 | 0.002 | 0.09 | 0.07 | 2:5   |

Supplements enriched with iron compounds are highlighted in gray in the table.

\*ND - not available; value cannot be calculated due to lack of data

\*NA - no data from the manufacturer

LOQ<sub>Fe</sub> = 0.158 µg/mL; LOQ<sub>Zn</sub> = 0.03 µg/mL;

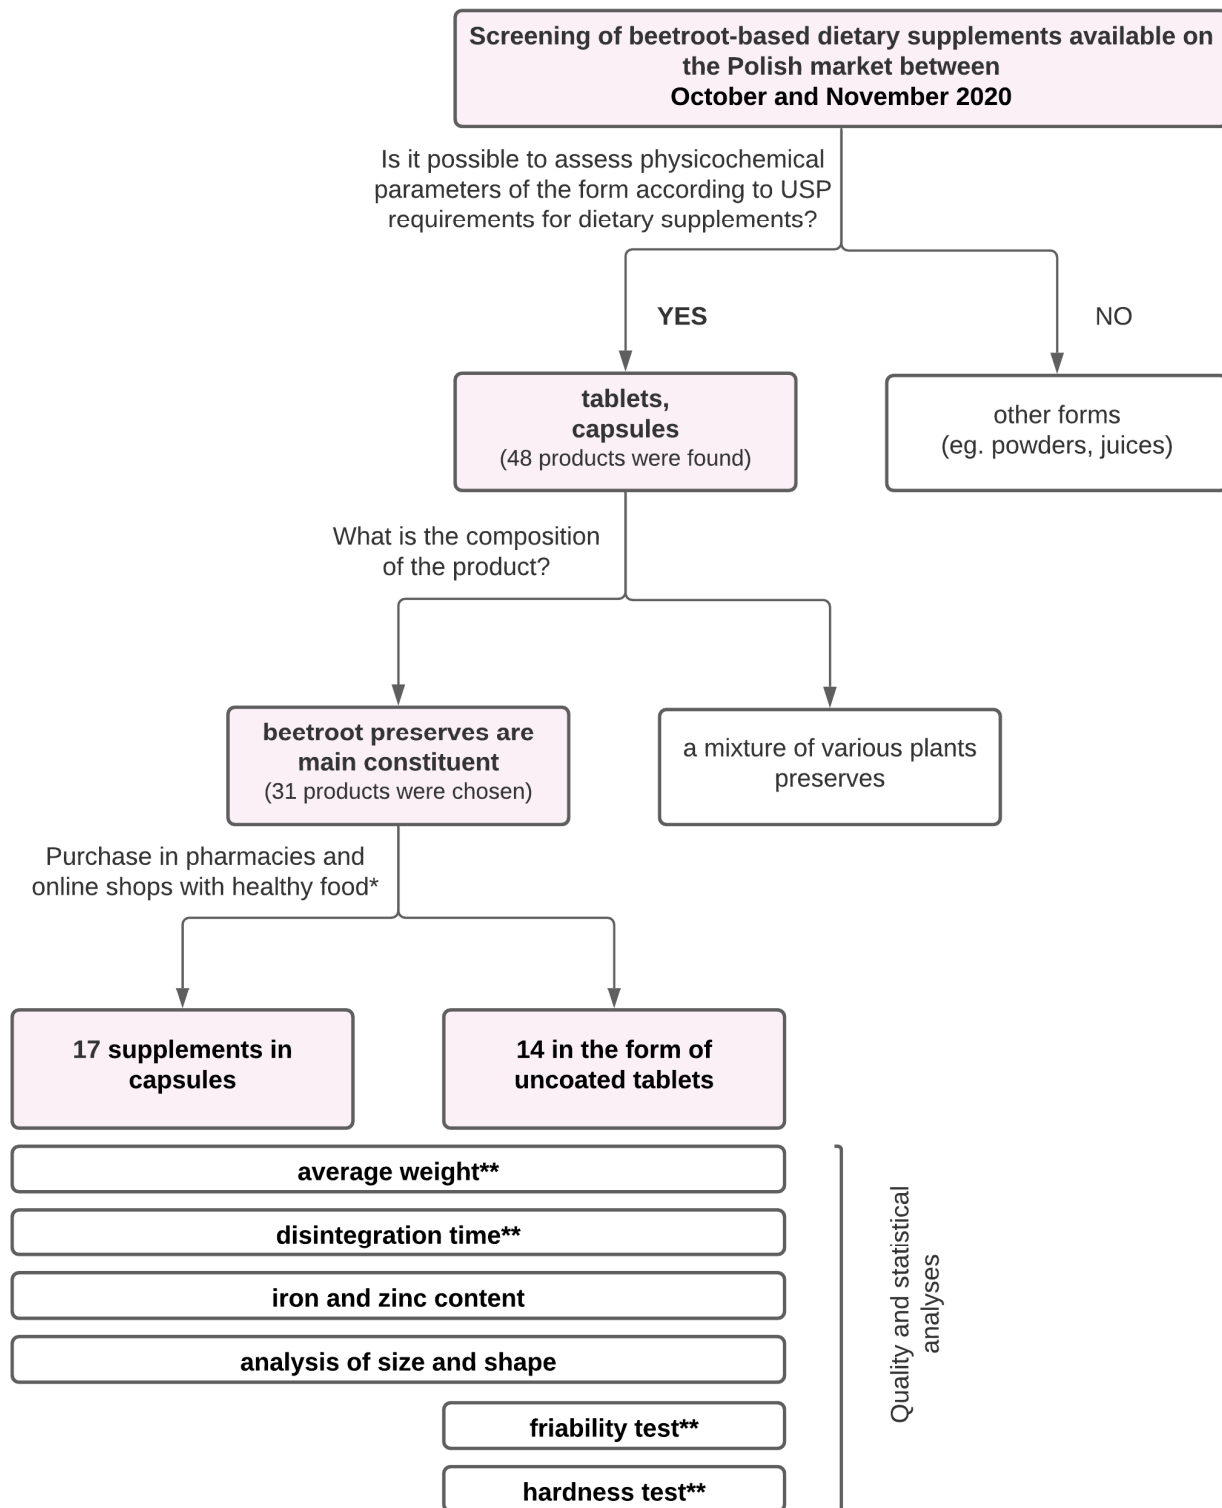

\* supplements were bought in 3 the largest pharmacies in Poland and 7 online shops with healthy food found via the largest trading platform (allegro.pl)

\*\*analyses were performed according to USP 43-NF 38 requirements

**Figure S1:** A diagram illustrating the experimental design
